# Supplementary material for: Ultrastructural Changes of Neuroendocrine Pheochromocytoma Cell Line PC-12 Exposed In Vitro to Rotenone
Source: MDPI journal article supplement (doi:10.3390/brainsci14050476), 2024-05-08
Supplement: s1 [file s1]

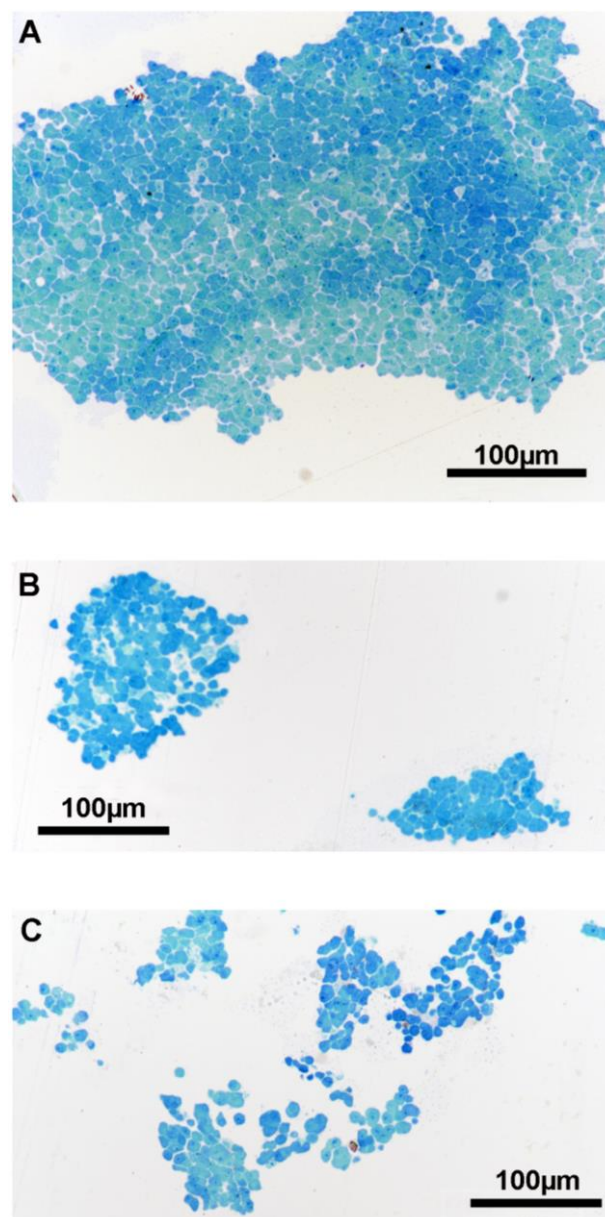

**Supplementary Figure S1.** Light microscopy of PC12 cells. Representative LM pictures of PC12 untreated (A), treated with rotenone 24 – and 48 hours (B-C). Magnification: 20x.
